# Supplementary material for: The Zea mays mutants opaque2 and opaque16 disclose lysine change in waxy maize as revealed by RNA-Seq
Source: PubMed Central journal article supplement (PMC6706447; doi:10.1038/s41598-019-48478-6), 2019-08-22
Supplement: 41598_2019_48478_MOESM1_ESM.pdf [file 41598_2019_48478_MOESM1_ESM.pdf]

# The *Zea mays* mutants *opaque2* and *opaque16* disclose lysine change in waxy maize as revealed by RNA-Seq

Wei Wang<sup>1,2</sup>, Suzhen Niu<sup>1</sup>, Yi Dai<sup>1</sup>, Mingchun Wang<sup>2</sup>, Yan Li<sup>1</sup>, Wenpeng Yang<sup>2\*</sup> & Degang Zhao<sup>1,2,\*</sup>

<sup>1</sup> The State Key Laboratory Breeding Base of Green Pesticide and Agricultural Bioengineering, The Key Laboratory of Plant Resources Conservation and Germplasm Innovation in Mountainous Region (Ministry of Education), Guizhou University, Guiyang 550025, China.

<sup>2</sup> Guizhou Institute of Upland Food Crops, Guiyang Station for DUS Testing Center of New Plant Varieties (MOA), Guizhou Academy of Agricultural Sciences, Guiyang 550006, China.

\* Correspondence: dgzhao@gzu.edu.cn (D.Z.), Tel.: +86-138-8501-2693; ywpmaize@126.com (W.Y.), Tel.: +86-135-1191-6286

## Additional Information

**Figure S1.** Phenotypic features of *o2*, *o16* lines and wild type. **(A)** Photographs of mature kernels taken under normal light. **(B)** Light transmission of mature kernels on a light box. **(C)** Cross-sections of mature kernels on a light box, Bars = 1 cm.

**Figure S2.** The number of identified genes in each sample.

**Figure S3.** The heatmap of correlation coefficient values acrossing samples. a, b, c represents three biological replicates. Gradient color barcode at the right top indicates the minimum value in white and the maximum in blue. If one sample is highly similar with another one, the correlation value between them is very close to 1.

**Figure S4.** A breeding flowchart adapted for the introgression of *o2* and *o16* genes into the waxy line QCL5019. MAS, marker-assisted selection; FS, foreground selection; BS, background selection.

**Table S1.** Summary for RNA sequencing data of QCL5019, QCL8006\_1 and QCL8006\_2.

**Table S2.** Alignment statistic of reads aligned with reference gene.

**Table S3.** Alignment statistic of reads aligned with reference genome.

**Table S4.** QC20 and QC30 of RNA sequencing data for QCL5019, QCL8006\_1 and QCL8006\_2.

**Table S5.** FPKM of all gene for QCL5019, QCL8006\_1 and QCL8006\_2.

**Table S6.** 272 DEGs of QCL5019 vs. QCL8006\_1 and QCL5019 vs. QCL8006\_2.

**Table S7.** GO analysis of DEGs of QCL5019 vs. QCL8006\_1 and QCL5019 vs. QCL8006\_2.

**Table S8.** Pathway analysis of DEGs of QCL5019 vs. QCL8006\_1 and QCL5019 vs. QCL8006\_2.

**Table S9.** The qPCR primers of seventeen candidate DEGs for quantitative real-time PCR analysis.

**Table S10.** Fifteen DEGs involved in zein synthesis.

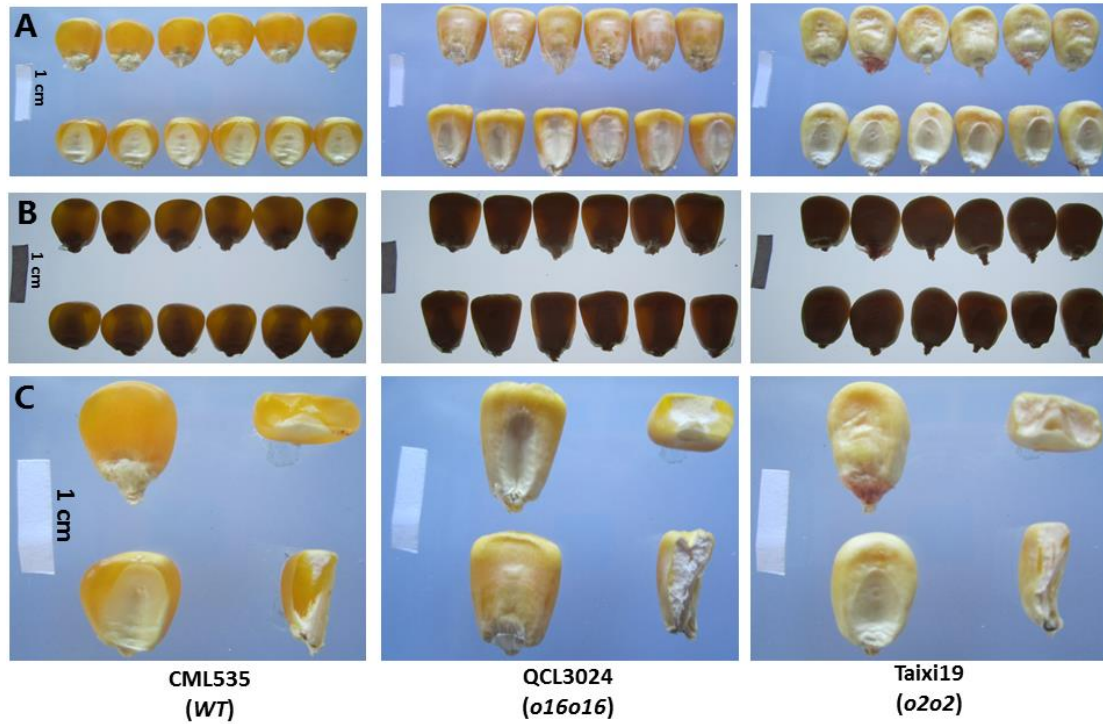

**Figure S1** Phenotypic features of *o2*, *o16* lines and wild type. **(A)** Photographs of mature kernels taken under normal light. **(B)** Light transmission of mature kernels on a light box. **(C)** Cross-sections of mature kernels on a light box, Bars = 1 cm.

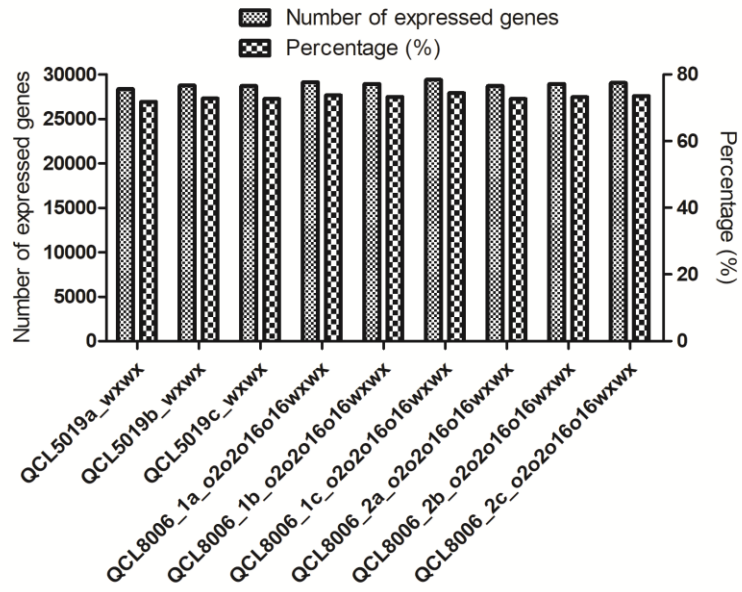

**Figure S2.** The number of identified genes in each sample.

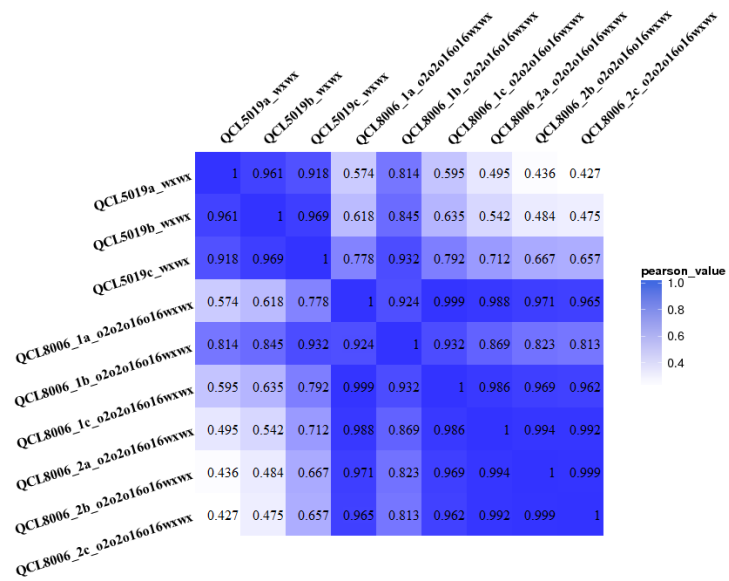

**Figure S3.** The heatmap of correlation coefficient values acrossing samples. a, b, c represents three biological replicates. Gradient color barcode at the right top indicates the minimum value in white and the maximum in blue. If one sample is highly similar with another one, the correlation value between them is very close to 1.

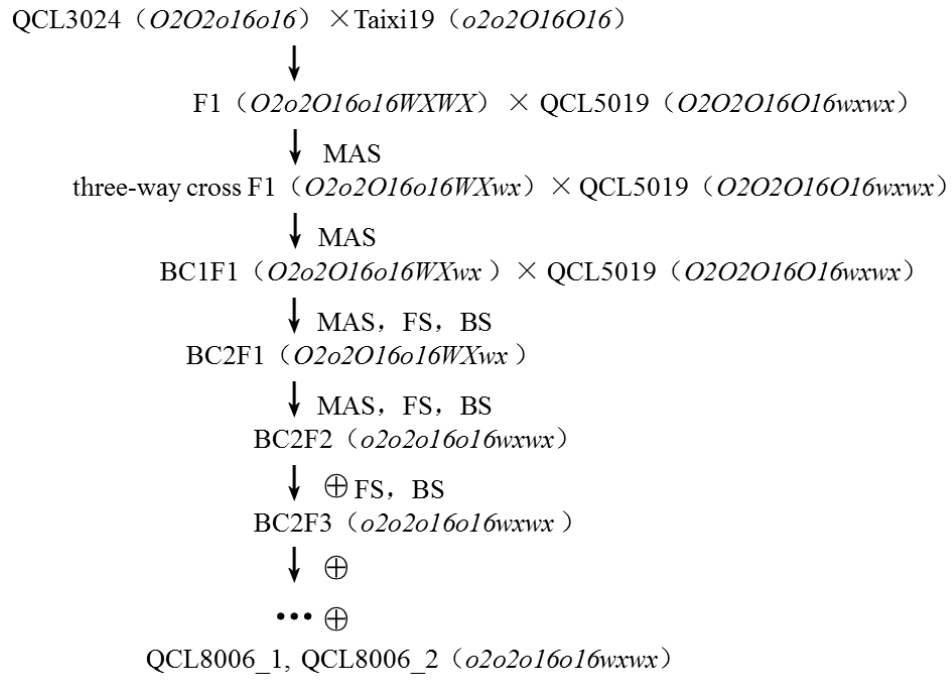

**Figure S4.** A breeding flowchart adapted for the introgression of *o2* and *o16* genes into the waxy line QCL5019. MAS, marker-assisted selection; FS, foreground selection; BS, background selection.

**Table S1.** Summary for RNA sequencing data of QCL5019, QCL8006\_1 and QCL8006\_2.

| Sample                    | Sequencing Strategy | Raw Data Size (bp) | Discard Reads related to N | Discard Reads related to low qual | Discard Reads related to Adapter | Raw Reads Number | Clean Data Size (bp) | Clean Reads Number | Clean Data Rate (%) |
|---------------------------|---------------------|--------------------|----------------------------|-----------------------------------|----------------------------------|------------------|----------------------|--------------------|---------------------|
| QCL5019a_wxwx             | SE50                | 1160101700         | 9908                       | 53619                             | 17823                            | 23202034         | 1156034200           | 23120684           | 99.64               |
| QCL5019b_wxwx             | SE50                | 1202485350         | 41068                      | 18814                             | 44680                            | 24049707         | 1197257250           | 23945145           | 99.56               |
| QCL5019c_wxwx             | SE50                | 1189537850         | 38545                      | 8941                              | 3984                             | 23790757         | 1186964350           | 23739287           | 99.78               |
| QCL8006_1a_o2o2o16o16wxwx | SE50                | 1196707250         | 41262                      | 13306                             | 90146                            | 23934145         | 1189471550           | 23789431           | 99.39               |
| QCL8006_1b_o2o2o16o16wxwx | SE50                | 1186843750         | 42694                      | 27379                             | 4358                             | 23736875         | 1183122200           | 23662444           | 99.68               |
| QCL8006_1c_o2o2o16o16wxwx | SE50                | 1205623100         | 41710                      | 20380                             | 50965                            | 24112462         | 1199970350           | 23999407           | 99.53               |
| QCL8006_2a_o2o2o16o16wxwx | SE50                | 1152633500         | 39116                      | 13178                             | 33018                            | 23052670         | 1148367900           | 22967358           | 99.62               |
| QCL8006_2b_o2o2o16o16wxwx | SE50                | 1206844550         | 5013                       | 9821                              | 6396                             | 24136891         | 1205783050           | 24115661           | 99.91               |
| QCL8006_2c_o2o2o16o16wxwx | SE50                | 1206836950         | 3780                       | 4610                              | 33964                            | 24136739         | 1204719250           | 24094385           | 99.82               |

Note: Clean Data Rate (%)=Clean Reads Number/Raw Reads Number.

**Table S2.** Alignment statistic of reads aligned with reference gene.

| Sample                    | Total Reads | Total Mapped Reads (%) | Unique Match(%) | Multi-position Match (%) | Total Unmapped Reads (%) |
|---------------------------|-------------|------------------------|-----------------|--------------------------|--------------------------|
| QCL5019a_wxwx             | 23120684    | 81.41                  | 49.1            | 32.31                    | 18.59                    |
| QCL5019b_wxwx             | 23945145    | 81.38                  | 49.83           | 31.55                    | 18.62                    |
| QCL5019c_wxwx             | 23739287    | 81.93                  | 51.3            | 30.62                    | 18.07                    |
| QCL8006_1a_o2o2o16o16wxwx | 23789431    | 81.83                  | 58.37           | 23.45                    | 18.17                    |
| QCL8006_1b_o2o2o16o16wxwx | 23662444    | 81.2                   | 56.76           | 24.44                    | 18.8                     |
| QCL8006_1c_o2o2o16o16wxwx | 23999407    | 80.99                  | 57.63           | 23.37                    | 19.01                    |
| QCL8006_2a_o2o2o16o16wxwx | 22967358    | 83.45                  | 58.59           | 24.86                    | 16.55                    |
| QCL8006_2b_o2o2o16o16wxwx | 24115661    | 83.06                  | 58.62           | 24.44                    | 16.94                    |
| QCL8006_2c_o2o2o16o16wxwx | 24094385    | 84.08                  | 58.75           | 25.33                    | 15.92                    |

Note: Total Mapped Reads (%) = Unique Match (%) + Multi-position Match (%).

**Table S3.** Alignment statistic of reads aligned with reference genome.

| Sample                    | Total Reads | Total Mapped Reads (%) | Unique Match(%) | Multi-position Match (%) | Total Unmapped Reads (%) |
|---------------------------|-------------|------------------------|-----------------|--------------------------|--------------------------|
| QCL5019a_wxwx             | 23120684    | 90.22                  | 50.5            | 39.7                     | 9.78                     |
| QCL5019b_wxwx             | 23945145    | 90.46                  | 55.6            | 34.9                     | 9.55                     |
| QCL5019c_wxwx             | 23739287    | 91.68                  | 56.9            | 34.8                     | 8.32                     |
| QCL8006_1a_o2o2o16o16wxwx | 23789431    | 91.19                  | 63.5            | 27.7                     | 8.81                     |
| QCL8006_1b_o2o2o16o16wxwx | 23662444    | 91.24                  | 60.8            | 30.4                     | 8.76                     |
| QCL8006_1c_o2o2o16o16wxwx | 23999407    | 90.34                  | 62.3            | 28                       | 9.67                     |
| QCL8006_2a_o2o2o16o16wxwx | 22967358    | 91.91                  | 63.7            | 28.2                     | 8.08                     |
| QCL8006_2b_o2o2o16o16wxwx | 24115661    | 91.46                  | 64.3            | 27.1                     | 8.55                     |
| QCL8006_2c_o2o2o16o16wxwx | 24094385    | 92.15                  | 65.4            | 26.8                     | 7.84                     |

Note: Total Mapped Reads (%) = Unique Match (%) + Multi-position Match (%).



**Table S4.** QC20 and QC30 of RNA sequencing data for QCL5019, QCL8006\_1 and QCL8006\_2.

| Sample                    | Clean Read1<br>Q20(%) >= 90 | Clean Read1<br>Q30(%) >= | Clean Reads >= 20<br>(M) | Gene Unique Mapping<br>Ratio(%) >= 80 | Genome Mapping<br>Ratio(%) >= 50 |
|---------------------------|-----------------------------|--------------------------|--------------------------|---------------------------------------|----------------------------------|
| QCL5019a_wxwx             | 94.5 (Y)                    | 84.69                    | 23.12 (Y)                | 60.31 (N)                             | 90.22 (Y)                        |
| QCL5019b_wxwx             | 96.5 (Y)                    | 87.31                    | 23.95 (Y)                | 61.23 (N)                             | 90.46 (Y)                        |
| QCL5019c_wxwx             | 97.1 (Y)                    | 88.61                    | 23.74 (Y)                | 62.61 (N)                             | 91.68 (Y)                        |
| QCL8006_1a_o2o2o16o16wxwx | 96.8 (Y)                    | 88.15                    | 23.79 (Y)                | 71.33 (N)                             | 91.19 (Y)                        |
| QCL8006_1b_o2o2o16o16wxwx | 95.9 (Y)                    | 86.12                    | 23.66 (Y)                | 69.90 (N)                             | 91.24 (Y)                        |
| QCL8006_1c_o2o2o16o16wxwx | 96.3 (Y)                    | 86.77                    | 24.00 (Y)                | 71.16 (N)                             | 90.34 (Y)                        |
| QCL8006_2a_o2o2o16o16wxwx | 96.7 (Y)                    | 87.71                    | 22.97 (Y)                | 70.21 (N)                             | 91.91 (Y)                        |
| QCL8006_2b_o2o2o16o16wxwx | 97.1 (Y)                    | 89.83                    | 24.12 (Y)                | 70.58 (N)                             | 91.46 (Y)                        |
| QCL8006_2c_o2o2o16o16wxwx | 97.8 (Y)                    | 91.16                    | 24.09 (Y)                | 69.87 (N)                             | 92.15 (Y)                        |

Note: Q20, the percentage of the number of bases with Sequencing base mass value greater than 20 in the total number of bases in the original data; Q30, the percentage of the number of bases with Sequencing base mass value greater than 30 in the total number of bases in the original data.

**Table S9.** The qPCR primers of seventeen candidate DEGs for quantitative real-time PCR analysis.

| NO. | Gene ID                 | Forward(5'- 3')          | Reverse(5'- 3')          | Amplicon length (bp) |
|-----|-------------------------|--------------------------|--------------------------|----------------------|
| P1  | <i>Zm00001d047124.1</i> | AGCTAAACCCGACACCTTTC     | AAGTGGAGGAGGATGCAATG     | 123                  |
| P2  | <i>Zm00001d027861.1</i> | GATCCAAAGAGAGGCCAAAGA    | GAAGGTCGAGGACAAACCTATT   | 122                  |
| P3  | <i>Zm00001d025862.1</i> | CTCGGTGTGGTCTTATCTGTAATC | CAGGAACGAACACATCCAATAAAC | 105                  |
| P4  | <i>Zm00001d014258.1</i> | GTCACAGTCAGGGTATCAAAGG   | GACTTGCTCCGTCTGTAATGAA   | 111                  |
| P5  | <i>Zm00001d049380.1</i> | CGACAGAAATGGACGGGATAAA   | CACTTCACTTCACGGGTCTT     | 132                  |
| P6  | <i>Zm00001d035443.1</i> | CGGAGTGGAACCAGACATAAT    | CGTGGTCGCCGTAGTTTAT      | 113                  |
| P7  | <i>Zm00001d016198.1</i> | TCGATGGAAGCTGATGGAATG    | GTATATGGTAGCAGCAGGCTAAA  | 91                   |
| P8  | <i>Zm00001d027536.1</i> | GCTGAGTGGTCTTTCACCAT     | GCAGGATTACCTACAGCCATAC   | 104                  |
| P9  | <i>Zm00001d052079.1</i> | CTGGTAGAGCTGGACTGATAGA   | GAGATTGTCCCAGAGAGAGAAATG | 96                   |
| P10 | <i>Zm00001d020984.1</i> | AGTTCCACGGCACGAAAT       | CACCTTCCAGTAGCAGATGAG    | 122                  |
| P11 | <i>Zm00001d037498.1</i> | GCAGCCTCAGACATCTTFACT    | GTAGCGAAGCCATGCAAATG     | 102                  |
| P12 | <i>Zm00001d016684.1</i> | GATTCATGGCCCTCGATAGAC    | AGATAGCCCTCTCCTCTAAC     | 107                  |
| P13 | <i>Zm00001d044129.1</i> | TTGTGAGGGTGATGGGATTG     | CTCTACCACCAAAGCACCTATT   | 95                   |
| P14 | <i>Zm00001d050032.1</i> | GAAAGAGGGTTCAGGCTTATCT   | CTGGTATTGGCTTCTGGTTATTC  | 105                  |
| P15 | <i>Zm00001d010801.1</i> | CCAAGAAATTGCTGGAAGGTTT   | GTACAGACCAGGCAGAGTAATG   | 99                   |
| P16 | <i>Zm00001d024575.1</i> | CGACCGACAAGAACAGAAACTA   | CTCTTTAGTCCACAACCACCTC   | 117                  |
| P17 | <i>Zm00001d046234.1</i> | CTGTCGTTCCAAGTGCCAT      | GGGTACTCCTCTCAACTCTGTA   | 104                  |

**Table S10.** Fifteen DEGs involved in zein synthesis.

| gene id                                                            | log2Ratio | log2Ratio | description                                           |
|--------------------------------------------------------------------|-----------|-----------|-------------------------------------------------------|
| <i>Zm00001d048851.1</i><br>( <i>fl4 - flouy4</i> )                 | -3.14     | -3.91     | encodes member of 19kD $\alpha$ -zein z1A-1 subfamily |
| <i>Zm00001d030855.1</i><br>( <i>az19D2 - alpha zein 19kDa D2</i> ) | -2.04     | -9.34     | alpha zein 19kDa D2 precursor                         |
| <i>Zm00001d019155.1</i>                                            | -1.83     | -5.79     | zein-alpha A20-like precursor                         |
| <i>Zm00001d019162.1</i>                                            | -1.583    | -5.78     | 19 kDa zein A20                                       |
| <i>Zm00001d019160.1</i>                                            | -1.67     | -6.06     | zein-alpha A20-like precursor                         |
| <i>Zm00001d019156.1</i>                                            | -2.17     | -6.25     | 19 kDa zein A20                                       |
| <i>Zm00001d048847.1</i>                                            | -2.95     | -8.03     | zein-alpha Z4 precursor                               |
| <i>Zm00001d048852.1</i>                                            | -2.19     | -6.77     | zein-alpha A30-like                                   |
| <i>Zm00001d049476.1</i>                                            | -2.77     | -7.29     | zein-alpha 19A2-like                                  |
| <i>Zm00001d048810.1</i>                                            | -8.50     | -9.15     | 22 kD zein                                            |
| <i>Zm00001d048806.1</i>                                            | -7.53     | -9.07     | 22kD alpha zein 5 precursor                           |
| <i>Zm00001d048812.1</i>                                            | -9.93     | -12.52    | 22kD alpha zein 4 precursor                           |
| <i>Zm00001d048816.1</i>                                            | -7.54     | -11.39    | alpha-zein protein precursor                          |
| <i>Zm00001d049243.1</i>                                            | -8.50     | -11.31    | 22kD alpha zein 1 precursor                           |
| <i>Zm00001d048813.1</i>                                            | -4.56     | -12.46    | zein-alpha 22C2 Precursor                             |
